# Supplementary material for: Insights into the enhanced hydrogen adsorption on M/La2O3 (M = Ni, Co, Fe)
Source: Royal Society of Chemistry journal article supplement (doi:10.1039/d3cp00735a), 2023-01-01
Supplement: d3cp00735a1.pdf [file d3cp00735a1.pdf]

## Supplemental Information for

### Insights into the enhanced hydrogen adsorption on M/La<sub>2</sub>O<sub>3</sub> (M=Ni, Co, Fe)

Changyin Zhong, Yifei Yang\*, Yun Fang, Jun Chen, Bomin Feng, Hongbing Wang, Wenhua Luo,  
Yunxi Yao\*

Institute of Materials, China Academy of Engineering Physics, Jiangyou 621908, P. R. China.

E-mail addresses: [yangyifei@caep.cn](mailto:yangyifei@caep.cn) (Y. Yang); [yaoyunxi@caep.cn](mailto:yaoyunxi@caep.cn) (Y. Yao)

#### Supplemental Fig. S1-8.

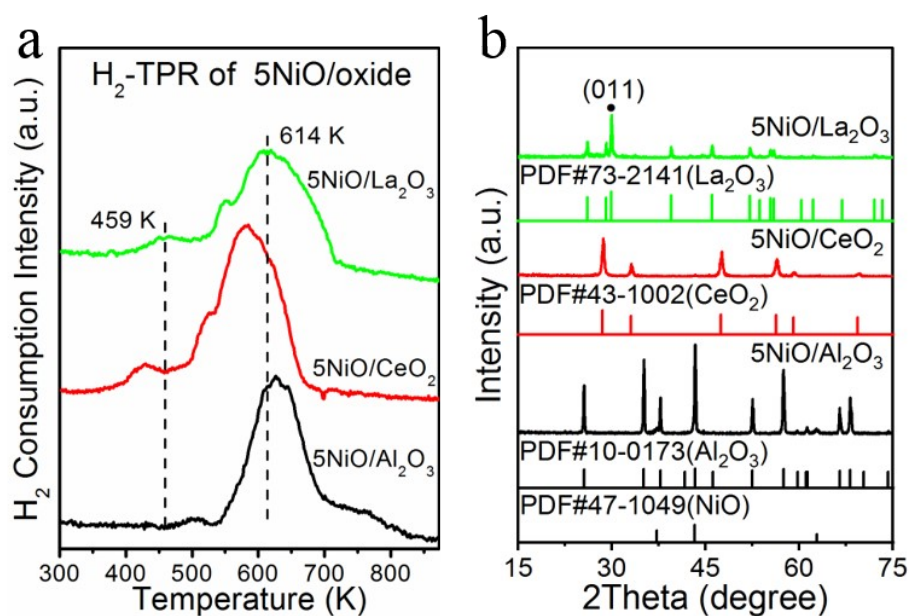

**Fig. S1.** H<sub>2</sub>-TPR (a) and XRD (b) of the 5NiO/La<sub>2</sub>O<sub>3</sub>, 5NiO/CeO<sub>2</sub> and 5NiO/Al<sub>2</sub>O<sub>3</sub>.

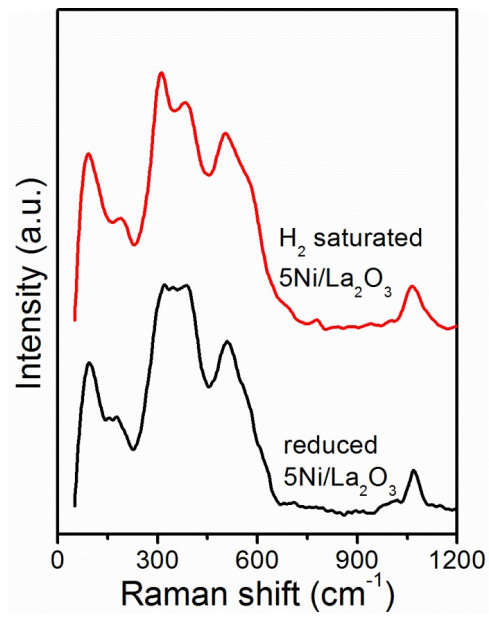

**Fig. S2.** Ex situ Raman spectra of reduced and H<sub>2</sub> saturated 5Ni/La<sub>2</sub>O<sub>3</sub>. The peaks at around 308, 690 and 502 cm<sup>-1</sup> are assigned to the La-O vibration of La<sub>2</sub>O<sub>3</sub>.

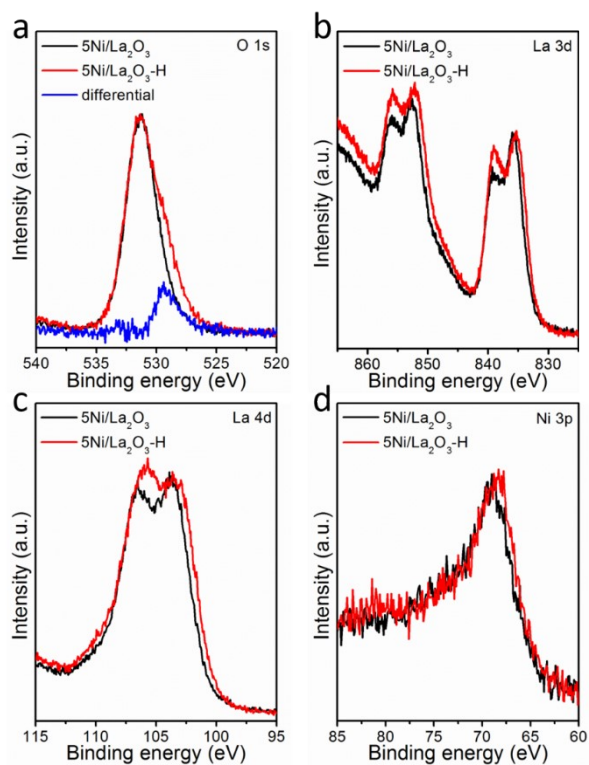

**Fig. S3.** XPS spectra of reduced 5Ni/La<sub>2</sub>O<sub>3</sub> and 5Ni/La<sub>2</sub>O<sub>3</sub>-H (H<sub>2</sub> saturated). O 1s (a), La 3d (b), La 4d (c) and Ni 3p (d). The O1s spectra were normalized to the La-O peak at 531.6 eV. Differential spectra are shown to illustrate the changes before and after H<sub>2</sub> adsorption.

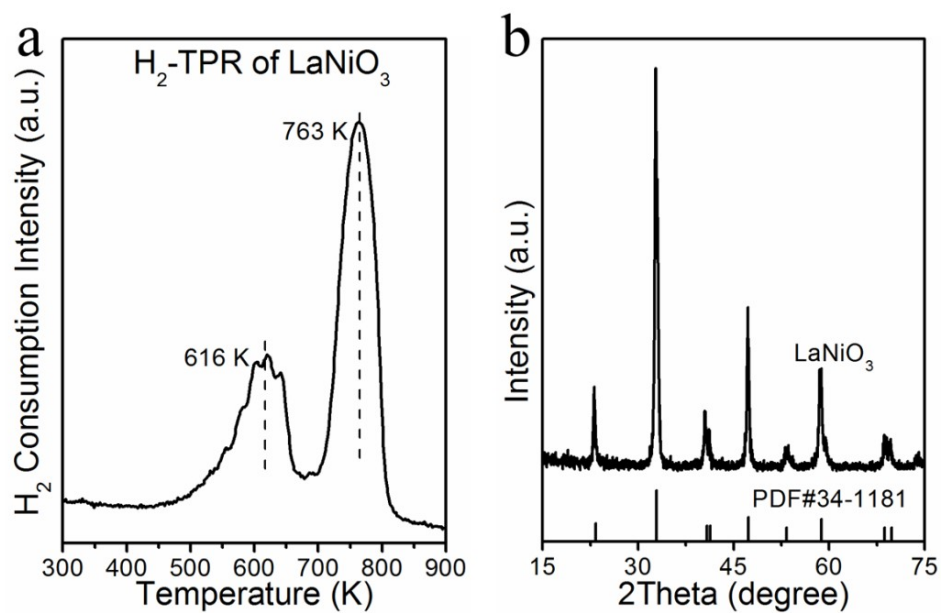

**Fig. S4.** H<sub>2</sub>-TPR (a) and XRD (b) of LaNiO<sub>3</sub>.

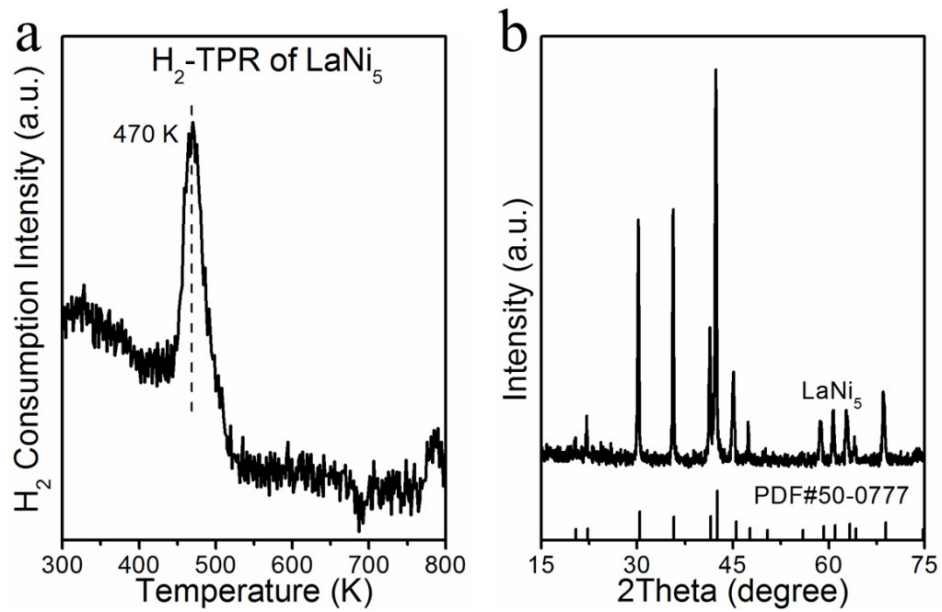

**Fig. S5.** H<sub>2</sub>-TPR (a) and XRD (b) of LaNi<sub>5</sub>.

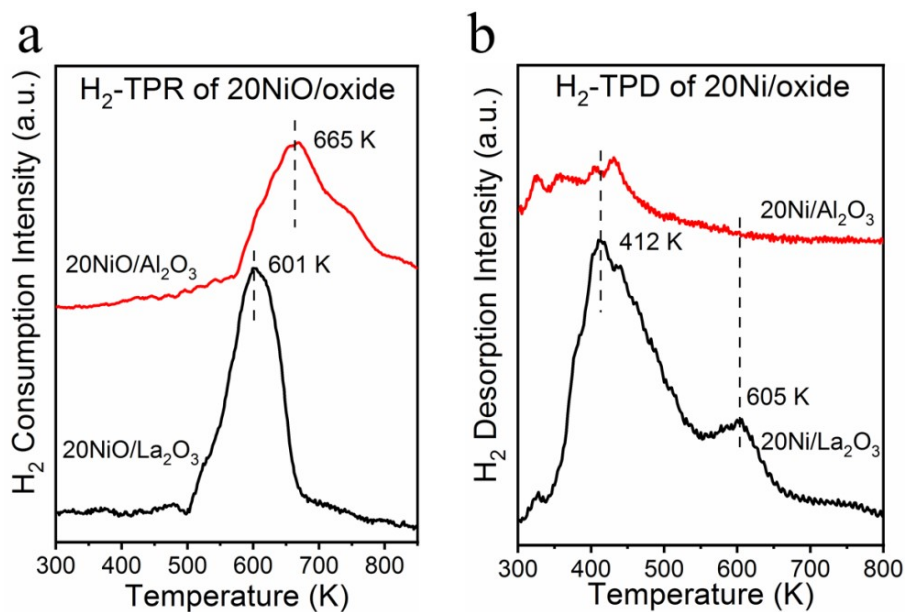

**Fig. S6.** H<sub>2</sub>-TPR (a) of 20NiO/La<sub>2</sub>O<sub>3</sub> and 20NiO/Al<sub>2</sub>O<sub>3</sub> (20 wt% Ni). H<sub>2</sub>-TPD (b) from H<sub>2</sub> saturated of 20Ni/La<sub>2</sub>O<sub>3</sub> and 20Ni/Al<sub>2</sub>O<sub>3</sub> at atmospheric pressure at 300 K for 15 min in 50% H<sub>2</sub>/Ar (100 mL min<sup>-1</sup>) reduced at 773 K.

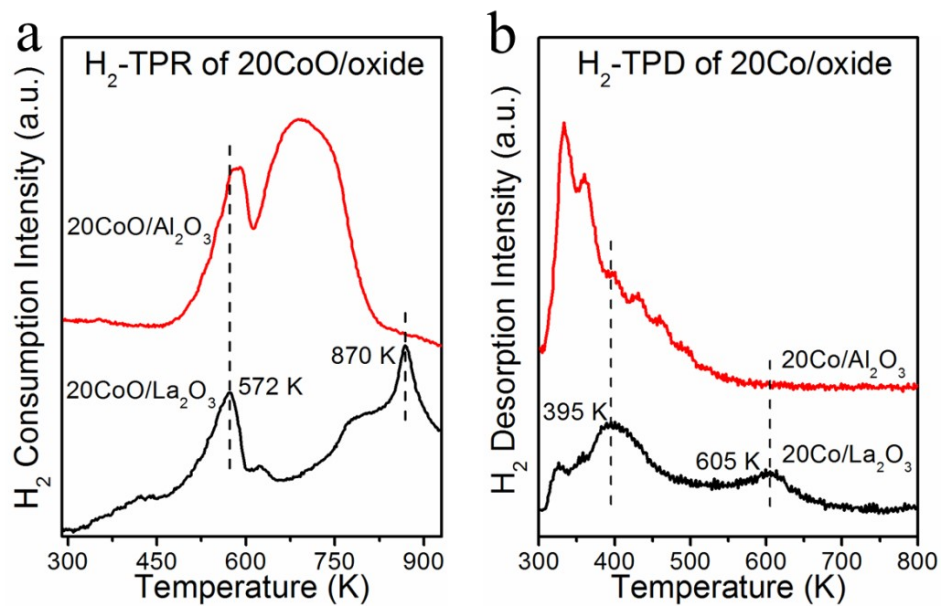

**Fig. S7.** H<sub>2</sub>-TPR (a) of 20CoO/La<sub>2</sub>O<sub>3</sub> and 20CoO/Al<sub>2</sub>O<sub>3</sub> (20 wt% Co). H<sub>2</sub>-TPD (b) from H<sub>2</sub> saturated of 20Co/La<sub>2</sub>O<sub>3</sub> and 20Co/Al<sub>2</sub>O<sub>3</sub> at atmospheric pressure at 300 K for 15 min in 50% H<sub>2</sub>/Ar (100 mL min<sup>-1</sup>) reduced at 773 K.

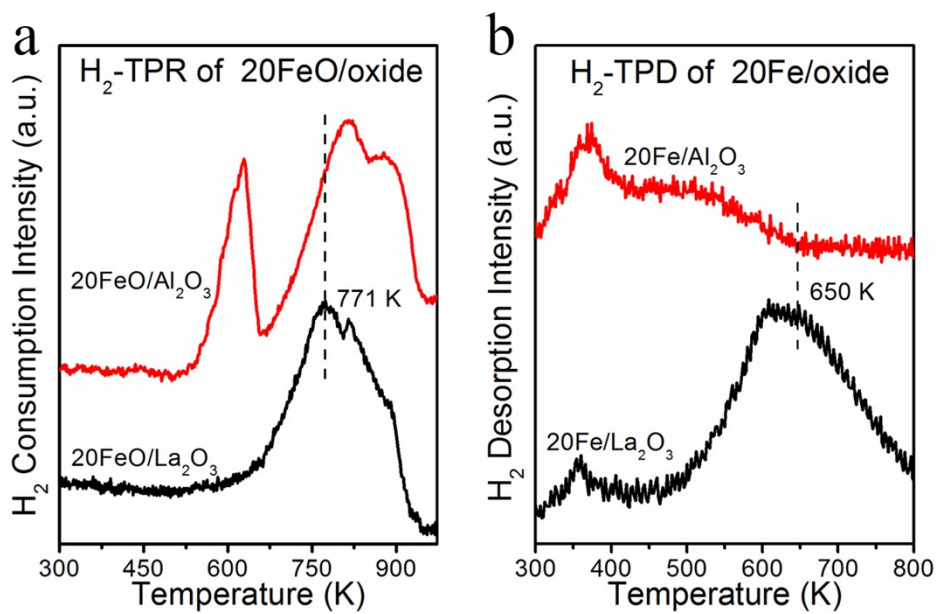

**Fig. S8.** H<sub>2</sub>-TPR (a) of 20FeO/La<sub>2</sub>O<sub>3</sub> and 20FeO/Al<sub>2</sub>O<sub>3</sub> (20 wt% Fe). H<sub>2</sub>-TPD (b) from H<sub>2</sub> saturated of 20Fe/La<sub>2</sub>O<sub>3</sub> and 20Fe/Al<sub>2</sub>O<sub>3</sub> at atmospheric pressure at 300 K for 15 min in 50% H<sub>2</sub>/Ar (100 mL min<sup>-1</sup>) reduced at 773 K.
